# Supplementary material
Source: publisher figshare collection journal article supplement (https://sage.figshare.com/ndownloader/files/31074040)
Supplement: Supplementary file 1 [file 31074040]

**Supplemental Figure 1.** Internal control rat data for SDMA. N=45 control male SD rats age 8-9 weeks compared to N=5 Group 1 animals, p<0.0001.

**Supplemental Figure 2**. Terminal body weight (g) decreases with dose and duration.

**Supplemental Figure 3.** Percent body weight gain as compared to baseline values.

**Supplemental Figure 4.** Terminal kidney weight (g), measured as a pair at necropsy.
